# Supplementary material for: Translation, Cultural Adaptation and Validation of The Caregiver Well-Being Scale (CWBS) in Iranian Schizophrenia Caregivers: A Methodological and Cross-Sectional Study
Source: Research Square preprint supplement (doi:10.21203/rs.3.rs-113686/v1), 2020-12-04
Supplement: Supplementary file 1 [file da47e830e124f69c9cd5b637.docx]

| **بخش اول- فعالیتهای شما در سه ماه گذشته: در این قسمت، تعدادی از فعالیت های روزمره که خود ما انجام می دهیم یا کسی برای ما انجام می دهد لیست شده است. به سه ماه گذشته خود فکر کنید و گزینه ای را که نشان می دهد این فعالیتها در طول سه ماه گذشته به چه مقدار برای شما برآورده شده است را مشخص کنید:** | | | | | | |
| --- | --- | --- | --- | --- | --- | --- |
| **همیشه** | **اکثر اوقات** | **گاهی اوقات** | **بندرت** | **هرگز** | **لیست فعالیت ها** | **شماره** |
| **5** | **4** | **3** | **2** | **1** | **خرید مواد غذایی** | **1** |
| **5** | **4** | **3** | **2** | **1** | **رسیدگی به کارهای شخصی روزمره (خوردن غذا، نظافت شخصی، شستن لباس)** | **2** |
| **5** | **4** | **3** | **2** | **1** | **رسیدگی به نیازهای سلامتی-بهداشتی (پیشگیری و درمان)** | **3** |
| **5** | **4** | **3** | **2** | **1** | **رسیدگی به امور منزل (نظافت، تعمیرات، گل و گیاه و ... )** | **4** |
| **5** | **4** | **3** | **2** | **1** | **شرکت در رویدادها در امکان مذهبی و/یا در اجتماع** | **5** |
| **5** | **4** | **3** | **2** | **1** | **صرف وقت برای تفریح با دوستان و/یا خانواده** | **6** |
| **5** | **4** | **3** | **2** | **1** | **رسیدگی یا دادن پاداش به خود ( انجام کارهای مورد علاقه، روش‌های آرامسازی، ورزش کردن، داشتن سرگرمی و خنده و...)** | **7** |
| **5** | **4** | **3** | **2** | **1** | **برنامه ریزی برای آینده مالی (داشتن شغل و/یا درآمد)** | **8** |
| **بخش دوم- نیازها در سه ماه گذشته: در زیر لیست تعدادی از نیازهای اساسی که هر فردی دارد، آورده شده است. به سه ماه گذشته خود فکر کنید و گزینه ای که نشان می دهد آن نیازها در طول سه ماه گذشته درمورد شما چگونه برآورده شده است را انتخاب نمایید.** | | | | | | |
| **همیشه** | **اکثر اوقات** | **گاهی اوقات** | **بندرت** | **هرگز** | **لیست نیازها** | **شماره** |
| **5** | **4** | **3** | **2** | **1** | **داشتن رژیم غذایی مناسب و متعادل** | **1** |
| **5** | **4** | **3** | **2** | **1** | **داشتن خواب کافی** | **2** |
| **5** | **4** | **3** | **2** | **1** | **دریافت مراقبت های سلامتی مناسب** | **3** |
| **5** | **4** | **3** | **2** | **1** | **داشتن سرپناه مناسب (محل امنی برای زندگی)** | **4** |
| **5** | **4** | **3** | **2** | **1** | **داشتن احساس امنیت درمورد آینده مالی** | **5** |
| **5** | **4** | **3** | **2** | **1** | **داشتن احساس خوب نسبت به خود ( احساس با ارزش بودن، داشتن هدف در زندگی و...)** | **6** |

**(Persian translated and adapted version of CWBS) پرسشنامه تندرستی مراقبین**

| **I. ACTIVITIES**  Below are listed a number of activities that each of us do or someone does for us. Thinking over the past three months, indicate to what extent you think each activity has been met by circling the appropriate number on the scale provided below. You do not have to be the one doing the activity. You are being asked to rate the extent to which each activity has been taken care of in a timely way. | | | | | | |
| --- | --- | --- | --- | --- | --- | --- |
| number | **ACTIVITIES** | Rarely | Occasionally | Sometimes | Frequently | Usually |
| 1 | Buying food | 1 | 2 | 3 | 4 | 5 |
| 2 | Taking care of personal daily activities (meals, hygiene, laundry) | 1 | 2 | 3 | 4 | 5 |
| 3 | Attending to medical needs (preventive and curative) | 1 | 2 | 3 | 4 | 5 |
| 4 | Keeping up with home maintenance activities (lawn, cleaning, house repairs, etc.) | 1 | 2 | 3 | 4 | 5 |
| 5 | Participating in events at religious places and/or in the community | 1 | 2 | 3 | 4 | 5 |
| 6 | Taking time to have fun with friends and/or family | 1 | 2 | 3 | 4 | 5 |
| 7 | Treating or rewarding yourself (doing favorite activities, relaxing, exercising, having a hobby and laughing, etc.) | 1 | 2 | 3 | 4 | 5 |
| 8 | Making plans for your financial future (having job and/or income) | 1 | 2 | 3 | 4 | 5 |
| **II. NEEDS**  Below are listed a number of needs we all have. For each need listed, think about your life over the past three months. During this period of time, indicate to what extent you think each need has been met by circling the appropriate number on the scale provided below. | | | | | | |
| number | **NEEDS** | Rarely | Occasionally | Sometimes | Frequently | Usually |
| 1 | Eating a well-balanced diet | 1 | 2 | 3 | 4 | 5 |
| 2 | Getting enough sleep | 1 | 2 | 3 | 4 | 5 |
| 3 | Receiving appropriate health care | 1 | 2 | 3 | 4 | 5 |
| 4 | Having adequate shelter(having a safe place to live in) | 1 | 2 | 3 | 4 | 5 |
| 5 | Feeling secure about your financial future | 1 | 2 | 3 | 4 | 5 |
| 6 | Feeling good about yourself (feeling valuable, having purpose in life, etc.) | 1 | 2 | 3 | 4 | 5 |

**(Back translation of the Persian adapted version of CWBS to English)**

**CAREGIVER WELL-BEING SCALE (Original version)**

**I. ACTIVITIES**

Below are listed a number of activities that each of us do or someone does for us. Thinking over the past three months, indicate to what extent you think each activity has been met by circling the appropriate number on the scale provided below. You do not have to be the one doing the activity. You are being asked to rate the extent to which each activity has been taken care of in a timely way.

1. Rarely 2. Occasionally 3. Sometimes 4. Frequently 5. Usually

1. Buying food 1 2 3 4 5

1. Taking care of personal daily activities (meals, hygiene, laundry) 1 2 3 4 5

3. Attending to medical needs 1 2 3 4 5

1. Keeping up with home maintenance activities (lawn,

cleaning, house repairs, etc.) 1 2 3 4 5

5. Participating in events at church and/or in the community 1 2 3 4 5

6. Taking time to have fun with friends and/or family 1 2 3 4 5

7. Treating or rewarding yourself 1 2 3 4 5

8. Making plans for your financial future 1 2 3 4 5

**II. NEEDS**

Below are listed a number of needs we all have. For each need listed, think about your life over the past three months. During this period of time, indicate to what extent you think each need has been met by circling the appropriate number on the scale provided below.

1. Rarely 2. Occasionally 3. Sometimes 4. Frequently 5. Usually

1. Eating a well-balanced diet 1 2 3 4 5

2. Getting enough sleep 1 2 3 4 5

3. Receiving appropriate health care 1 2 3 4 5

4. Having adequate shelter 1 2 3 4 5

5. Feeling good about yourself 1 2 3 4 5

6. Feeling secure about your financial future 1 2 3 4 5

*Use only with permission by authors Susan Tebb, Marla Berg-Weger and Doris M. Rubio, Saint Louis University (314)977-2730*

© 1999 Susan Tebb, Marla Berg-Weger and Doris M. Rubio (original scale © 1993), revised 2012.
